# Supplementary material for: The ganglioside antigen GD2 is surface-expressed in Ewing sarcoma and allows for MHC-independent immune targeting
Source: PubMed Central journal article supplement (PMC3304425; doi:10.1038/bjc.2012.57), 2012-02-28
Supplement: bjc201257x1.pdf [file bjc201257x1.pdf]

## Suppl. Figure S1

| Cell line          | D3S1358 | vWA   | FGA   | Amelogenin | TH01  | TPOX  | CSF1PO | D5S818 | D13S317 | D7S820 | Cell bank profile available?* |                |
|--------------------|---------|-------|-------|------------|-------|-------|--------|--------|---------|--------|-------------------------------|----------------|
| <b>CADO-ES-1</b>   | 16,18   | 14,18 | 21,22 | x,x        | 6,9   | 8,11  | 11,12  | 11,12  | 10,12   | 11,13  | Yes                           | 100% Match     |
| <b>SK-ES-1</b>     | 16,18   | 14,17 | 20,21 | x,y        | 6,10  | 8,8   | 11,11  | 12,12  | 8,9     | 10,11  | Yes                           | 100% Match     |
| <b>RD-ES-1</b>     | 15,15   | 17,17 | 21,25 | x,y        | 7,8   | 9,11  | 11,11  | 11,11  | 11,12   | 10,10  | Yes                           | 100% Match     |
| <b>TC-32</b>       | 15,16   | 15,18 | 23,24 | X,X        | 6,10  | 9,11  | 11,13  | 12,13  | 10,12   | 8,11   | No                            | Unique profile |
| <b>A4573</b>       | 16,17   | 18,19 | 24,24 | X,X        | 7,8   | 8,10  | 11,13  | 11,12  | 8,10    | 11,11  | No                            | Unique profile |
| <b>WE-68</b>       | 15,18   | 16,18 | 19,23 | x,x        | 6,8   | 8,10  | 12,12  | 11,11  | 9,11    | 10,12  | No                            | Unique profile |
| <b>5838</b>        | 16,16   | 15,18 | 20,22 | x,y        | 10,10 | 8,8   | 11,11  | 10,10  | 13,13   | 11,11  | No                            | Unique profile |
| <b>TTC-466</b>     | 17,18   | 15,17 | 24,25 | x,x        | 7,7   | 8,8   | 10,10  | 10,10  | 10,12   | 8,10   | No                            | Unique profile |
| <b>VH-64</b>       | 16,17   | 15,19 | 23,23 | x,x        | 6,6   | 8,8   | 11,12  | 12,13  | 8,11    | 12,12  | No                            | Unique profile |
| <b>MS-PES-1</b>    | 15,18   | 16,18 | 18,22 | x,y        | 9,10  | 11,11 | 10,11  | 11,12  | 10,11   | 9,11   | No                            | Unique profile |
| <b>MS-PES-3</b>    | 18,18   | 16,17 | 23,25 | x,y        | 6,10  | 8,8   | 10,10  | 12,13  | 11,12   | 10,12  | No                            | Unique profile |
| <b>TC-71</b>       | 15,17   | 17,18 | 24,26 | x,y        | 10    | 8,9   | 10,11  | 10     | 11,12   | 10     | Yes                           | 100% Match     |
| <b>Fibroblasts</b> | 15,17   | 15,19 | 22,26 | x,x        | 6,6   | 8,9   | 10,10  | 11,12  | 11,13   | 8,10   | No                            | Unique profile |
| <b>LAN-5</b>       | 15,16   | 15,16 | 21,27 | x,y        | 6,10  | 8,8   | 10,11  | 11,11  | 9,12    | 10,10  | Yes                           | 100% Match     |
| <b>LAN-1</b>       | 16,17   | 16,19 | 19,24 | x,y        | 8,10  | 8,11  | 12,12  | 12,12  | 11,12   | 10,11  | Yes                           | 100% Match     |
| <b>JF</b>          | 15      | 16,19 | 23,25 | x,x        | 7,8   | 8,11  | 11,12  | 12,13  | 13      | 11     | No                            | Unique profile |
| <b>A204</b>        | 14,17   | 15,17 | 21    | x,x        | 8,10  | 8,9   | 10,13  | 12     | 11,12   | 8,10   | Yes                           | 100% Match     |

\*<http://www.dsmz.de/fp/cgi-bin/str.html>
