# Supplementary material for: The ganglioside antigen GD2 is surface-expressed in Ewing sarcoma and allows for MHC-independent immune targeting
Source: PubMed Central journal article supplement (PMC3304425; doi:10.1038/bjc.2012.57), 2012-02-28
Supplement: bjc201257x2.pdf [file bjc201257x2.pdf]

# Suppl. Figure S2

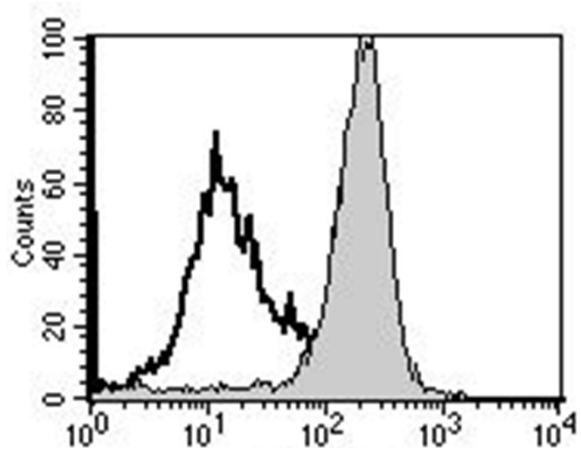

Anti-CD166 mAb 1172

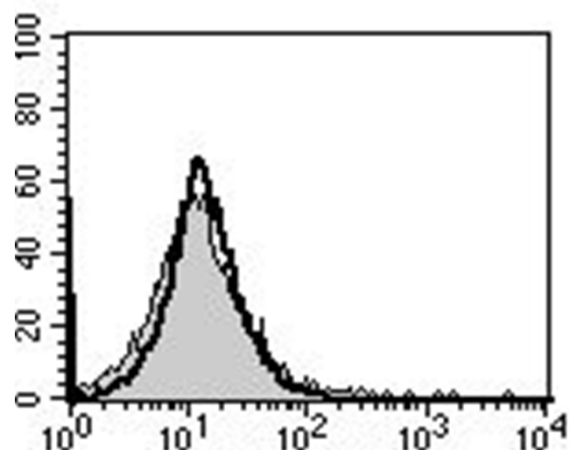

Anti- $G_{D2}$  mAb 14.G2a
