# Supplementary material for: The ganglioside antigen GD2 is surface-expressed in Ewing sarcoma and allows for MHC-independent immune targeting
Source: PubMed Central journal article supplement (PMC3304425; doi:10.1038/bjc.2012.57), 2012-02-28

# Suppl. Figure S3

A

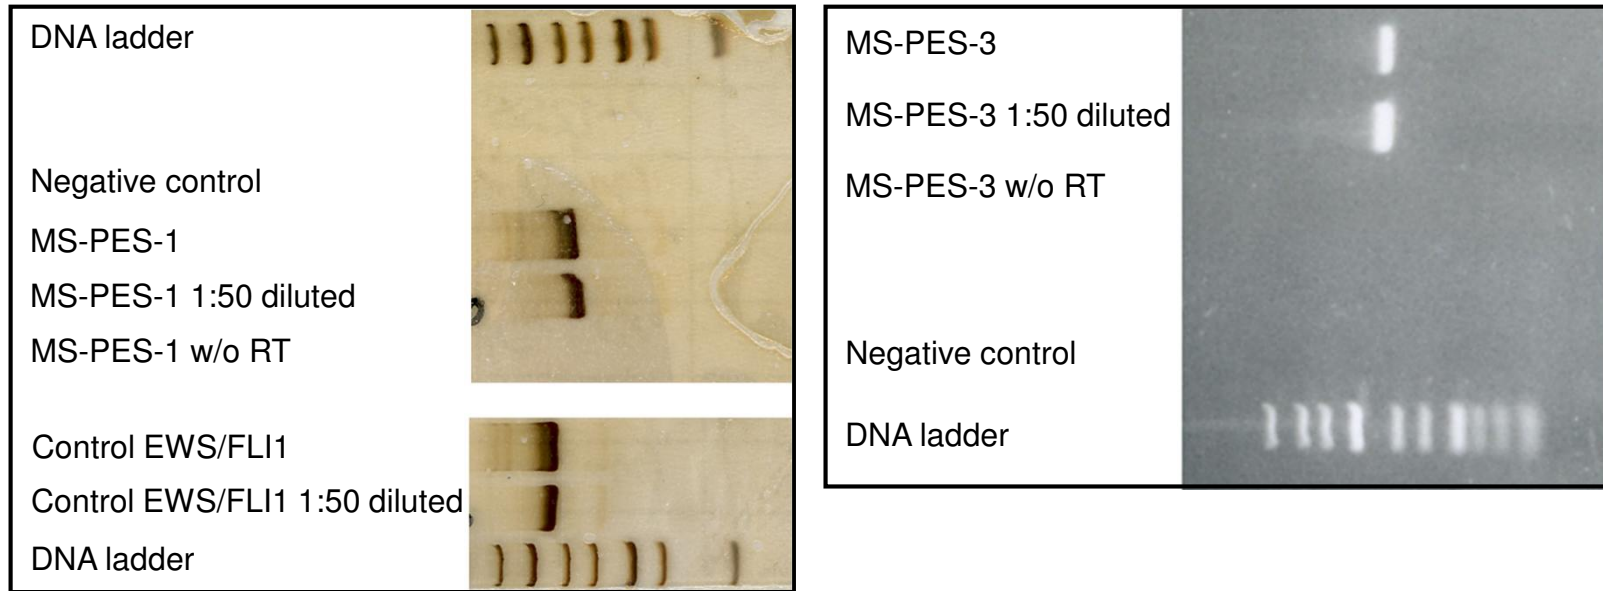

B

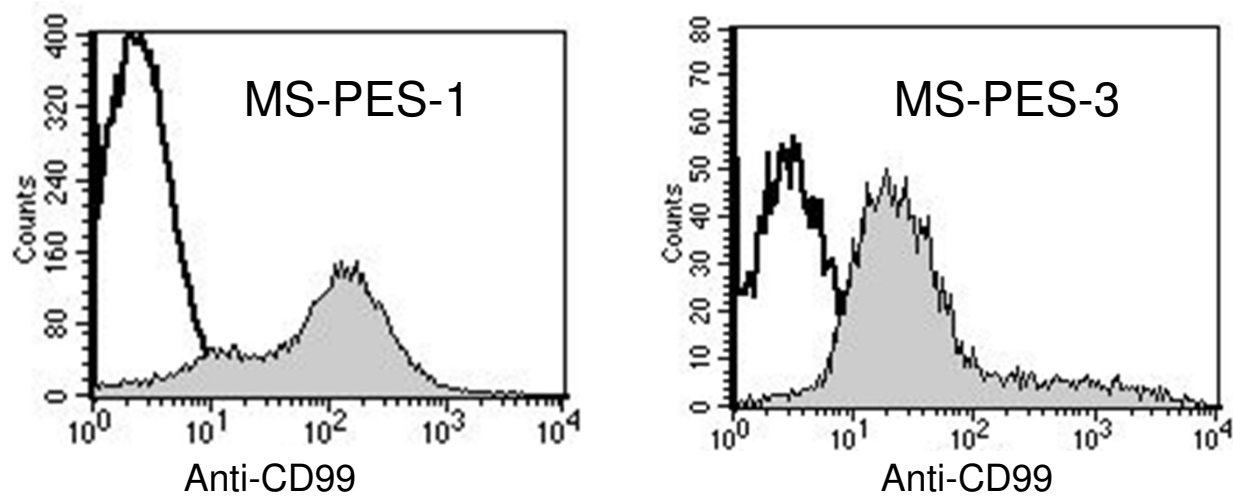

Supplement: bjc201257x3.pdf [file bjc201257x3.pdf]
