# Supplementary material for: The ganglioside antigen GD2 is surface-expressed in Ewing sarcoma and allows for MHC-independent immune targeting
Source: PubMed Central journal article supplement (PMC3304425; doi:10.1038/bjc.2012.57), 2012-02-28
Supplement: bjc201257x4.pdf [file bjc201257x4.pdf]

# Suppl. Figure S4

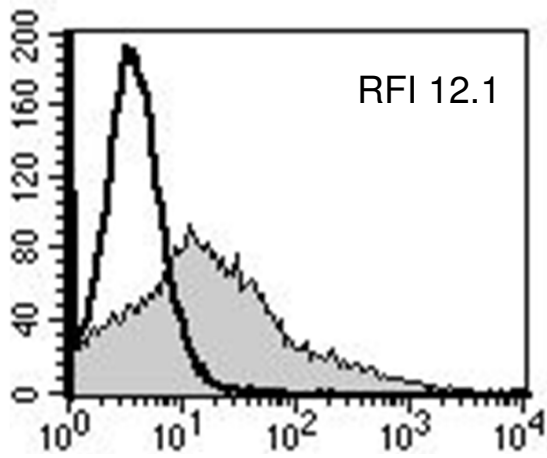

Cells from s.c. VH-64 tumor after 14.G2a-28 $\zeta$  CTL treatment

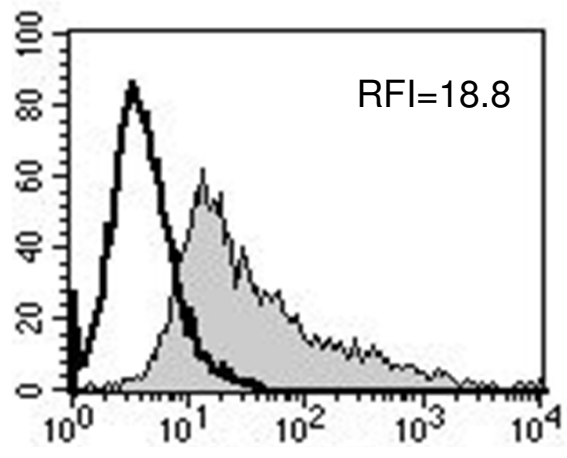

VH-64 original cell line
